# Supplementary material for: Correlation analysis between the chemical contents and bioactivity for the quality control of Alismatis Rhizoma
Source: PubMed Central journal article supplement — Acta Pharm Sin B. 2017 Sep 30;8(2):242–51. doi: 10.1016/j.apsb.2017.09.004 (PMC5925412; doi:10.1016/j.apsb.2017.09.004), 2017-09-30
Supplement: mmc1.pdf [file mmc1.pdf]

## Supplementary Information

**Table S1** Result of repeatability (monosaccharide components in polysaccharides).

| Monosaccharide | Content (%) | RSD (%) |
|----------------|-------------|---------|
| Glu            | 0.288       | 1.12    |
| Gal            | 0.029       | 2.76    |
| Ara            | 0.029       | 0.58    |
| Total          | 0.345       | 1.00    |

**Table S2** Result of intermediate precision (monosaccharide components in polysaccharides).

| Monosaccharide | Different days      |             |         | Different analysts      |             |         |
|----------------|---------------------|-------------|---------|-------------------------|-------------|---------|
|                |                     | Content (%) | RSD (%) |                         | Content (%) | RSD (%) |
| Glu            | 1 <sup>st</sup> day | 0.286       | 0.88    | 1 <sup>st</sup> analyst | 0.271       | 0.25    |
|                | 2 <sup>nd</sup> day | 0.275       | 0.94    | 2 <sup>nd</sup> analyst | 0.274       | 0.44    |
|                | 3 <sup>rd</sup> day | 0.272       | 0.84    | 3 <sup>rd</sup> analyst | 0.272       | 0.37    |
|                | Average             | 0.278       | 2.38    | Average                 | 0.272       | 0.53    |
| Gal            | 1 <sup>st</sup> day | 0.030       | 0.63    | 1 <sup>st</sup> analyst | 0.029       | 2.42    |
|                | 2 <sup>nd</sup> day | 0.029       | 0.94    | 2 <sup>nd</sup> analyst | 0.030       | 1.59    |
|                | 3 <sup>rd</sup> day | 0.028       | 1.31    | 3 <sup>rd</sup> analyst | 0.029       | 2.03    |
|                | Average             | 0.029       | 0.17    | Average                 | 0.029       | 2.44    |
| Ara            | 1 <sup>st</sup> day | 0.014       | 0.29    | 1 <sup>st</sup> analyst | 0.014       | 0.65    |
|                | 2 <sup>nd</sup> day | 0.014       | 0.19    | 2 <sup>nd</sup> analyst | 0.014       | 1.22    |
|                | 3 <sup>rd</sup> day | 0.014       | 2.22    | 3 <sup>rd</sup> analyst | 0.015       | 1.90    |
|                | Average             | 0.014       | 1.32    | Average                 | 0.014       | 3.14    |
| Total          | 1 <sup>st</sup> day | 0.330       | 0.73    | 1 <sup>st</sup> analyst | 0.314       | 0.04    |
|                | 2 <sup>nd</sup> day | 0.318       | 0.76    | 2 <sup>nd</sup> analyst | 0.318       | 0.58    |
|                | 3 <sup>rd</sup> day | 0.314       | 0.83    | 3 <sup>rd</sup> analyst | 0.316       | 0.41    |
|                | Average             | 0.321       | 2.26    | Average                 | 0.316       | 0.64    |

**Table S3** Linearity and range (monosaccharide components in polysaccharides).

| Monosaccharide | Regression equation    | $R^2$  | Linearity range (mg/mL) | LOD (mg/mL) | LOQ (mg/mL) |
|----------------|------------------------|--------|-------------------------|-------------|-------------|
| Glu            | $y = 4.163x + 0.0079$  | 0.9999 | 0.09375–1.875           | 0.008       | 0.023       |
| Gal            | $y = 8.8178x - 0.0047$ | 1.0000 | 0.03125–0.625           | 0.004       | 0.015       |
| Ara            | $y = 13.527x - 0.0026$ | 1.0000 | 0.028125–0.5625         | 0.004       | 0.014       |

**Table S4** Recovery test of monosaccharides and total content (monosaccharide components in polysaccharides).

| Monosaccharide |         | Recovery (%) | RSD (%) |
|----------------|---------|--------------|---------|
| Glu            | Low     | 98.90        | 2.19    |
|                | medium  | 100.03       | 1.68    |
|                | High    | 100.72       | 2.00    |
|                | Average | 99.88        | 1.88    |
| Gal            | Low     | 99.31        | 0.38    |
|                | medium  | 100.17       | 2.72    |
|                | High    | 101.15       | 2.71    |
|                | Average | 100.21       | 2.10    |
| Ara            | Low     | 100.18       | 0.46    |
|                | medium  | 99.51        | 1.55    |
|                | High    | 98.79        | 1.41    |
|                | Average | 99.49        | 1.23    |
| Total          | Low     | 99.00        | 1.93    |
|                | medium  | 100.02       | 1.75    |
|                | High    | 100.67       | 1.93    |
|                | Average | 99.89        | 1.78    |

**Table S5** Stability of sample solution (monosaccharide components in polysaccharides).

| Time (h)         | Glu (%) | Gal (%) | Ara (%) |
|------------------|---------|---------|---------|
| 0                | 0.283   | 0.029   | 0.028   |
| 2                | 0.276   | 0.029   | 0.028   |
| 4                | 0.275   | 0.029   | 0.028   |
| 6                | 0.273   | 0.029   | 0.028   |
| 8                | 0.275   | 0.029   | 0.027   |
| 10               | 0.275   | 0.029   | 0.027   |
| 12               | 0.272   | 0.028   | 0.027   |
| 24               | 0.276   | 0.027   | 0.028   |
| Average          | 0.276   | 0.029   | 0.028   |
| RSD for 24 h (%) | 1.24    | 3.09    | 2.05    |
| RSD for 8 h (%)  | 1.39    | 0.91    | 2.14    |

**Table S6** Content of Glu, Gal, Ara and total saccharides in 35 batches *Alismatis Rhizoma*.

|     | Glu (%) | RSD (%) | Gal (%) | RSD (%) | Ara (%) | RSD (%) | Total (%) | RSD (%) |
|-----|---------|---------|---------|---------|---------|---------|-----------|---------|
| JY1 | 0.258   | 0.22    | 0.058   | 0.62    | 0.046   | 0.18    | 0.368     | 0.27    |
| JY2 | 0.156   | 0.63    | 0.055   | 0.31    | 0.035   | 0.60    | 0.252     | 0.50    |
| JY3 | 0.350   | 1.29    | 0.073   | 2.20    | 0.045   | 2.78    | 0.476     | 0.48    |
| JY4 | 0.345   | 1.01    | 0.076   | 2.69    | 0.053   | 3.16    | 0.483     | 0.42    |
| JY5 | 0.167   | 1.91    | 0.069   | 2.52    | 0.032   | 1.51    | 0.277     | 2.02    |
| JY6 | 0.354   | 1.63    | 0.084   | 2.87    | 0.057   | 2.61    | 0.504     | 1.64    |
| JS1 | 0.117   | 2.38    | 0.040   | 1.18    | 0.031   | 1.09    | 0.192     | 1.35    |

|      |       |      |       |      |       |      |       |      |
|------|-------|------|-------|------|-------|------|-------|------|
| JS2  | 0.160 | 3.09 | 0.085 | 2.30 | 0.038 | 3.09 | 0.293 | 2.70 |
| JS3  | 0.166 | 1.26 | 0.062 | 1.70 | 0.049 | 1.67 | 0.284 | 0.63 |
| JS4  | 0.275 | 0.94 | 0.026 | 0.73 | 0.014 | 0.19 | 0.318 | 0.76 |
| JS5  | 0.234 | 2.54 | 0.058 | 3.33 | 0.041 | 2.31 | 0.339 | 2.12 |
| JS6  | 0.160 | 2.39 | 0.044 | 1.01 | 0.036 | 2.43 | 0.244 | 2.03 |
| JS7  | 0.534 | 1.41 | 0.079 | 2.92 | 0.048 | 1.51 | 0.670 | 0.87 |
| JS8  | 0.216 | 0.63 | 0.046 | 1.08 | 0.049 | 2.75 | 0.316 | 0.99 |
| JS9  | 0.348 | 2.59 | 0.093 | 3.21 | 0.055 | 1.94 | 0.506 | 1.88 |
| JS10 | 0.163 |      | 0.062 |      | 0.032 |      | 0.257 |      |
| JS11 | 0.347 |      | 0.091 |      | 0.058 |      | 0.496 |      |
| CY1  | 0.230 | 2.44 | 0.060 | 1.59 | 0.057 | 2.83 | 0.354 | 2.07 |
| CY2  | 0.543 | 3.21 | 0.075 | 2.30 | 0.044 | 2.18 | 0.671 | 2.48 |
| CY3  | 0.172 | 2.45 | 0.092 | 2.82 | 0.087 | 3.35 | 0.362 | 0.52 |
| CY4  | 0.193 | 0.33 | 0.049 | 0.60 | 0.034 | 0.32 | 0.282 | 0.21 |
| CY5  | 0.252 | 0.20 | 0.047 | 0.32 | 0.030 | 1.46 | 0.335 | 0.08 |
| CY6  | 0.283 | 2.45 | 0.089 | 1.17 | 0.089 | 1.45 | 0.472 | 1.90 |
| CY7  | 0.167 |      | 0.069 |      | 0.032 |      | 0.269 |      |
| CS1  | 0.176 | 2.28 | 0.063 | 2.22 | 0.043 | 1.23 | 0.290 | 1.96 |
| CS2  | 0.136 | 1.23 | 0.074 | 2.51 | 0.047 | 2.08 | 0.266 | 1.67 |
| CS3  | 0.121 | 3.00 | 0.099 | 2.72 | 0.044 | 2.49 | 0.274 | 0.27 |
| CS4  | 0.433 | 1.60 | 0.052 | 1.35 | 0.037 | 1.48 | 0.528 | 1.57 |
| CS5  | 0.130 | 2.57 | 0.065 | 0.31 | 0.036 | 1.06 | 0.238 | 1.22 |
| CS6  | 0.266 | 0.16 | 0.046 | 0.53 | 0.028 | 1.11 | 0.346 | 0.14 |
| CS7  | 0.092 | 1.22 | 0.043 | 2.26 | 0.026 | 1.03 | 0.167 | 1.10 |
| CS8  | 0.119 | 1.06 | 0.039 | 2.66 | 0.022 | 3.04 | 0.184 | 1.28 |
| CS9  | 0.219 | 0.84 | 0.054 | 2.96 | 0.044 | 2.91 | 0.323 | 0.53 |
| CS10 | 0.187 | 2.52 | 0.084 | 2.31 | 0.059 | 3.06 | 0.339 | 1.16 |
| CS11 | 0.354 | 1.63 | 0.084 | 2.87 | 0.057 | 2.61 | 0.504 | 1.64 |

**Table S7** Result of repeatability about the content of 11 triterpenes in sample.

| Compd.    | Content<br>( $\times 10^{-3}$ , %) | RSD<br>(%) | Compd. | Content<br>( $\times 10^{-3}$ , %) | RSD<br>(%) |
|-----------|------------------------------------|------------|--------|------------------------------------|------------|
| <b>4</b>  | 0.90                               | 2.36       | 15     | 70.23                              | 3.20       |
| <b>6</b>  | 5.29                               | 2.63       | 18     | 75.90                              | 1.00       |
| <b>7</b>  | 22.43                              | 2.37       | 22     | 25.65                              | 3.03       |
| <b>10</b> | 91.97                              | 2.93       | 26     | 4.06                               | 2.70       |
| <b>12</b> | 1.63                               | 2.71       | 31     | 16.17                              | 1.78       |
| <b>14</b> | 23.67                              | 2.53       | Total  | 337.91                             | 0.82       |

**Table S8** Result of intermediate precision about the content of 11 triterpenes in sample.

| Compd.   | Different day                      |         | Different analyst                  |                         |      |      |
|----------|------------------------------------|---------|------------------------------------|-------------------------|------|------|
|          | Content<br>( $\times 10^{-3}$ , %) | RSD (%) | Content<br>( $\times 10^{-3}$ , %) | RSD (%)                 |      |      |
| <b>4</b> | 1 <sup>st</sup> day                | 0.88    | 2.60                               | 1 <sup>st</sup> analyst | 8.90 | 1.59 |
|          | 2 <sup>nd</sup> day                | 0.87    | 3.09                               | 2 <sup>nd</sup> analyst | 8.73 | 1.36 |

|           |                     |       |      |                         |        |      |
|-----------|---------------------|-------|------|-------------------------|--------|------|
|           | 3 <sup>rd</sup> day | 0.89  | 2.25 | 3 <sup>rd</sup> analyst | 8.96   | 0.30 |
|           | Average             | 0.89  | 2.61 | Average                 | 8.86   | 1.56 |
| <b>6</b>  | 1 <sup>st</sup> day | 5.26  | 3.05 | 1 <sup>st</sup> analyst | 5.36   | 2.38 |
|           | 2 <sup>nd</sup> day | 5.43  | 1.61 | 2 <sup>nd</sup> analyst | 5.30   | 2.36 |
|           | 3 <sup>rd</sup> day | 5.32  | 2.08 | 3 <sup>rd</sup> analyst | 5.37   | 3.91 |
|           | Average             | 5.34  | 2.42 | Average                 | 5.34   | 2.64 |
| <b>7</b>  | 1 <sup>st</sup> day | 22.13 | 2.09 | 1 <sup>st</sup> analyst | 20.70  | 3.95 |
|           | 2 <sup>nd</sup> day | 22.70 | 1.59 | 2 <sup>nd</sup> analyst | 22.00  | 2.98 |
|           | 3 <sup>rd</sup> day | 22.60 | 2.46 | 3 <sup>rd</sup> analyst | 21.80  | 0.79 |
|           | Average             | 22.48 | 2.14 | Average                 | 21.50  | 3.75 |
| <b>10</b> | 1 <sup>st</sup> day | 90.00 | 2.42 | 1 <sup>st</sup> analyst | 88.60  | 0.39 |
|           | 2 <sup>nd</sup> day | 90.20 | 3.13 | 2 <sup>nd</sup> analyst | 88.90  | 2.73 |
|           | 3 <sup>rd</sup> day | 91.77 | 1.81 | 3 <sup>rd</sup> analyst | 90.53  | 1.72 |
|           | Average             | 90.66 | 2.36 | Average                 | 8934   | 1.91 |
| <b>12</b> | 1 <sup>st</sup> day | 1.65  | 1.60 | 1 <sup>st</sup> analyst | 1.58   | 1.32 |
|           | 2 <sup>nd</sup> day | 1.58  | 0.96 | 2 <sup>nd</sup> analyst | 1.67   | 1.04 |
|           | 3 <sup>rd</sup> day | 1.64  | 3.37 | 3 <sup>rd</sup> analyst | 1.64   | 1.61 |
|           | Average             | 1.62  | 2.70 | Average                 | 1.63   | 2.79 |
| <b>14</b> | 1 <sup>st</sup> day | 23.33 | 1.31 | 1 <sup>st</sup> analyst | 23.43  | 3.20 |
|           | 2 <sup>nd</sup> day | 23.60 | 1.53 | 2 <sup>nd</sup> analyst | 23.73  | 1.29 |
|           | 3 <sup>rd</sup> day | 23.70 | 1.93 | 3 <sup>rd</sup> analyst | 24.00  | 1.10 |
|           | Average             | 23.54 | 1.56 | Average                 | 23.66  | 2.07 |
| <b>15</b> | 1 <sup>st</sup> day | 71.00 | 0.12 | 1 <sup>st</sup> analyst | 72.17  | 1.26 |
|           | 2 <sup>nd</sup> day | 70.90 | 1.66 | 2 <sup>nd</sup> analyst | 72.17  | 0.92 |
|           | 3 <sup>rd</sup> day | 71.27 | 0.65 | 3 <sup>rd</sup> analyst | 70.87  | 3.26 |
|           | Average             | 71.06 | 0.94 | Average                 | 71.73  | 1.20 |
| <b>18</b> | 1 <sup>st</sup> day | 75.50 | 1.38 | 1 <sup>st</sup> analyst | 75.60  | 2.55 |
|           | 2 <sup>nd</sup> day | 74.07 | 2.22 | 2 <sup>nd</sup> analyst | 75.00  | 1.41 |
|           | 3 <sup>rd</sup> day | 75.77 | 0.81 | 3 <sup>rd</sup> analyst | 75.83  | 3.19 |
|           | Average             | 75.11 | 1.72 | Average                 | 75.48  | 2.22 |
| <b>22</b> | 1 <sup>st</sup> day | 25.23 | 3.84 | 1 <sup>st</sup> analyst | 26.07  | 3.12 |
|           | 2 <sup>nd</sup> day | 26.37 | 1.53 | 2 <sup>nd</sup> analyst | 26.2.0 | 1.01 |
|           | 3 <sup>rd</sup> day | 26.33 | 1.71 | 3 <sup>rd</sup> analyst | 25.97  | 1.24 |
|           | Average             | 25.98 | 3.08 | Average                 | 26.08  | 1.80 |
| <b>26</b> | 1 <sup>st</sup> day | 4.10  | 2.20 | 1 <sup>st</sup> analyst | 4.02   | 1.66 |
|           | 2 <sup>nd</sup> day | 3.90  | 3.25 | 2 <sup>nd</sup> analyst | 4.18   | 1.10 |
|           | 3 <sup>rd</sup> day | 4.17  | 1.55 | 3 <sup>rd</sup> analyst | 4.01   | 1.95 |
|           | Average             | 4.04  | 3.45 | Average                 | 4.07   | 2.47 |
| <b>31</b> | 1 <sup>st</sup> day | 15.87 | 2.03 | 1 <sup>st</sup> analyst | 15.97  | 1.91 |

|              |                     |        |      |                         |        |      |
|--------------|---------------------|--------|------|-------------------------|--------|------|
|              | 2 <sup>nd</sup> day | 16.23  | 0.94 | 2 <sup>nd</sup> analyst | 15.90  | 2.52 |
|              | 3 <sup>rd</sup> day | 16.03  | 0.5  | 3 <sup>rd</sup> analyst | 15.97  | 1.91 |
|              | Average             | 16.04  | 1.56 | Average                 | 15.94  | 1.86 |
| <b>Total</b> | 1 <sup>st</sup> day | 334.96 | 0.14 | 1 <sup>st</sup> analyst | 334.17 | 0.29 |
|              | 2 <sup>nd</sup> day | 335.87 | 1.47 | 2 <sup>nd</sup> analyst | 335.92 | 0.78 |
|              | 3 <sup>rd</sup> day | 339.45 | 0.52 | 3 <sup>rd</sup> analyst | 336.88 | 1.11 |
|              | Average             | 336.76 | 0.99 | Average                 | 335.66 | 0.78 |

**Table S9** Recovery test of 11 triterpenes with three levels.

| Compd.    |         | Recovery (%) | RSD (%) |       |         | Recovery (%) | RSD (%) |
|-----------|---------|--------------|---------|-------|---------|--------------|---------|
| <b>4</b>  | Low     | 98.83        | 1.08    | 14    | Low     | 100.08       | 1.46    |
|           | Medium  | 98.19        | 1.43    |       | Medium  | 101.27       | 1.99    |
|           | High    | 97.90        | 1.05    |       | High    | 103.78       | 2.37    |
|           | Average | 98.31        | 1.12    |       | Average | 101.71       | 2.35    |
| <b>7</b>  | Low     | 100.58       | 1.10    | 15    | Low     | 100.08       | 2.85    |
|           | Medium  | 101.02       | 0.95    |       | Medium  | 98.61        | 0.43    |
|           | High    | 99.87        | 1.30    |       | High    | 99.21        | 1.72    |
|           | Average | 100.49       | 1.10    |       | Average | 99.30        | 1.81    |
| <b>26</b> | Low     | 100.18       | 0.46    | 18    | Low     | 100.99       | 1.98    |
|           | Medium  | 99.51        | 1.55    |       | Medium  | 99.96        | 0.76    |
|           | High    | 98.79        | 1.41    |       | High    | 100.45       | 1.87    |
|           | Average | 99.49        | 1.23    |       | Average | 100.46       | 1.48    |
| <b>6</b>  | Low     | 99.49        | 2.07    | 10    | Low     | 101.65       | 1.25    |
|           | Medium  | 100.70       | 3.04    |       | Medium  | 102.22       | 0.93    |
|           | High    | 99.78        | 2.60    |       | High    | 99.39        | 1.19    |
|           | Average | 99.99        | 2.32    |       | Average | 101.08       | 1.61    |
| <b>31</b> | Low     | 100.57       | 0.79    | 22    | Low     | 100.40       | 0.55    |
|           | Medium  | 101.03       | 0.31    |       | Medium  | 101.48       | 1.08    |
|           | High    | 101.30       | 0.88    |       | High    | 101.77       | 0.89    |
|           | Average | 100.97       | 0.69    |       | Average | 100.54       | 0.97    |
| <b>12</b> | Low     | 101.01       | 0.15    | Total | Low     | 100.81       | 0.71    |
|           | Medium  | 101.62       | 0.51    |       | Medium  | 100.49       | 0.27    |
|           | High    | 100.63       | 1.80    |       | High    | 100.24       | 0.37    |
|           | Average | 101.09       | 1.28    |       | Average | 100.51       | 0.49    |

**Table S10** Stability of 11 triterpenes in sample solution.

| Time (h) | Content ( $\times 10^{-3}$ , %) |          |           |          |           |           |           |           |           |           |           |
|----------|---------------------------------|----------|-----------|----------|-----------|-----------|-----------|-----------|-----------|-----------|-----------|
|          | <b>4</b>                        | <b>7</b> | <b>26</b> | <b>6</b> | <b>31</b> | <b>12</b> | <b>14</b> | <b>15</b> | <b>18</b> | <b>10</b> | <b>22</b> |
| 0        | 0.91                            | 2.27     | 4.12      | 5.04     | 15.9      | 1.65      | 23.9      | 71.1      | 75.4      | 87.1      | 26.70     |
|          |                                 |          |           |          | 0         |           | 0         | 0         | 0         | 0         |           |
| 2        | 0.90                            | 2.23     | 4.13      | 5.54     | 16.3      | 1.74      | 23.8      | 71.3      | 75.1      | 94.3      | 25.70     |
|          |                                 |          |           |          | 0         |           | 0         | 0         | 0         | 0         |           |

|                |      |      |      |      |      |      |      |      |      |      |       |
|----------------|------|------|------|------|------|------|------|------|------|------|-------|
| 4              | 0.89 | 2.19 | 4.25 | 5.42 | 15.8 | 1.70 | 23.6 | 71.3 | 74.9 | 91.6 | 26.40 |
|                |      |      |      |      | 0    |      | 0    | 0    | 0    | 0    |       |
| 6              | 0.89 | 2.20 | 4.33 | 5.28 | 16.5 | 1.69 | 23.9 | 72.4 | 71.0 | 86.9 | 26.20 |
|                |      |      |      |      | 0    |      | 0    | 0    | 0    | 0    |       |
| 8              | 0.89 | 2.25 | 4.36 | 5.55 | 15.6 | 1.73 | 23.6 | 71.3 | 75.2 | 88.0 | 25.70 |
|                |      |      |      |      | 0    |      | 0    | 0    | 0    | 0    |       |
| 12             | 0.90 | 2.22 | 4.08 | 5.32 | 16.5 | 1.78 | 23.9 | 71.4 | 76.9 | 88.7 | 27.00 |
|                |      |      |      |      | 0    |      | 0    | 0    | 0    | 0    |       |
| 24             | 0.86 | 2.33 | 4.17 | 5.32 | 15.7 | 1.81 | 24.0 | 72.5 | 77.4 | 94.3 | 25.00 |
|                |      |      |      |      | 0    |      | 0    | 0    | 0    | 0    |       |
| Average        | 0.89 | 2.24 | 4.21 | 5.35 | 16.0 | 1.73 | 23.8 | 71.6 | 75.1 | 90.1 | 26.10 |
|                |      |      |      |      | 4    |      | 1    | 1    | 3    | 3    |       |
| RSD for<br>24h | 1.84 | 2.13 | 2.59 | 3.27 | 2.38 | 3.16 | 0.66 | 0.81 | 2.74 | 3.60 | 2.62  |

**Table S11** Linearity and range for the determination of 11 triterpenes.

| Compd.    | Regression equation      | <i>R</i> | Linearity<br>range<br>(ng/mL) | LOD<br>(ng/mL) | LOQ<br>(ng/mL) |
|-----------|--------------------------|----------|-------------------------------|----------------|----------------|
| <b>4</b>  | $Y=9.63e+003x+3.8$       | 0.9993   | 0.4–32                        | 0.11           | 0.38           |
| <b>7</b>  | $Y=4.32e+003x-1.56e+003$ | 0.9998   | 16–640                        | 0.09           | 0.30           |
| <b>26</b> | $Y=1.78e+004x-582$       | 0.9999   | 2–160                         | 0.03           | 0.10           |
| <b>6</b>  | $Y=127x-130$             | 0.9996   | 10–300                        | 3.34           | 10.00          |
| <b>31</b> | $Y=8.17e+003x+1.9e+003$  | 0.9997   | 10–400                        | 0.06           | 0.20           |
| <b>12</b> | $Y=1.16e+004x-805$       | 0.9998   | 1.2–48                        | 0.18           | 0.60           |
| <b>14</b> | $Y=229x+2.86e+003$       | 0.9953   | 20–800                        | 6.06           | 20.00          |
| <b>15</b> | $Y=82.5x-5.26$           | 0.9971   | 30–2400                       | 9.09           | 30.00          |
| <b>18</b> | $Y=84x+520$              | 0.9999   | 60–2400                       | 4.55           | 15.00          |
| <b>10</b> | $Y=3.74e+003x-6.07e+003$ | 0.9997   | 60–2400                       | 0.05           | 0.15           |
| <b>22</b> | $Y=48.1x-8.89$           | 0.9967   | 21–420                        | 4.55           | 15.00          |

**Table S12** Content of 11 triterpenes in 35 batches *Alismatis Rhizoma* ( $\times 10^{-3}$ , %).

| 4    | RSD  | 7     | RSD  | 26    | RSD  | 6    | RSD  | 31    | RSD  | 12   | RSD  | 14    | RSD  | 15     | RSD  | 18     | RSD  | 10     | RSD  | 22    | RSD  | Total  |
|------|------|-------|------|-------|------|------|------|-------|------|------|------|-------|------|--------|------|--------|------|--------|------|-------|------|--------|
|      | (%)  |       | (%)  |       | (%)  |      | (%)  |       | (%)  |      | (%)  |       | (%)  |        | (%)  |        | (%)  |        | (%)  |       | (%)  |        |
| 1.20 | 2.09 | 29.20 | 1.78 | 7.10  | 1.23 | 7.76 | 2.31 | 29.83 | 2.38 | 1.43 | 2.52 | 17.87 | 2.76 | 14.90  | 2.42 | 40.10  | 0.90 | 78.43  | 0.82 | 23.70 | 2.11 | 251.53 |
| 0.04 | 1.97 | -     | -    | -     | -    | -    | -    | -     | -    | -    | -    | -     | -    | 18.23  | 3.65 | 116.00 | 3.11 | -      | -    | -     | -    | 134.2  |
| 0.52 | 1.43 | 24.93 | 1.98 | 6.52  | 0.83 | 4.87 | 3.60 | 22.43 | 1.12 | 1.43 | 0.81 | 15.10 | 1.75 | -      | -    | 21.10  | 1.42 | 70.77  | 2.19 | 8.86  | 1.81 | 179.11 |
| 1.17 | 0.85 | 28.60 | 2.07 | 7.39  | 0.35 | 7.84 | 0.73 | 31.83 | 1.79 | 1.52 | 1.32 | 17.73 | 2.60 | 5.51   | 2.47 | 33.20  | 2.68 | 76.33  | 1.90 | 18.73 | 0.82 | 229.86 |
| 0.48 | 2.75 | 6.50  | 3.02 | 0.92  | 0.85 | 2.41 | 2.40 | 2.17  | 1.87 | 0.52 | 1.72 | 14.47 | 2.62 | 141.33 | 1.08 | 119.00 | 0.84 | 39.57  | 1.30 | 16.13 | 3.12 | 343.50 |
| 0.63 | 1.76 | 10.20 | 1.61 | 1.64  | 0.98 | 3.37 | 1.69 | 3.49  | 2.51 | 0.46 | 2.82 | 10.37 | 2.01 | 83.47  | 1.63 | 95.90  | 2.01 | 39.63  | 2.34 | 17.57 | 3.14 | 266.73 |
| 0.05 | 3.06 | -     | -    | -     | -    | -    | -    | -     | -    | -    | -    | -     | -    | 17.30  | 2.52 | 116.67 | 3.25 | -      | -    | -     | -    | 134.0  |
| 0.56 | 1.30 | 14.77 | 0.97 | 5.06  | 1.41 | 3.39 | 2.24 | 14.70 | 1.80 | 0.78 | 1.40 | 9.40  | 2.81 | 8.97   | 2.23 | 25.63  | 3.52 | 48.30  | 2.18 | 10.67 | 3.79 | 142.23 |
| 0.95 | 0.52 | 14.47 | 0.73 | 3.17  | 1.44 | 4.82 | 0.60 | 7.97  | 2.17 | 0.77 | 1.23 | 12.10 | 0.83 | 50.40  | 1.39 | 68.93  | 1.97 | 53.73  | 3.54 | 24.07 | 2.05 | 241.37 |
| 0.60 | 1.26 | 16.73 | 1.69 | 3.81  | 1.24 | 2.62 | 3.91 | 8.20  | 1.46 | 1.16 | 2.18 | 21.70 | 3.32 | 48.50  | 2.70 | 49.43  | 2.93 | 82.10  | 1.24 | 13.07 | 0.88 | 247.92 |
| 0.52 | 1.27 | 11.60 | 1.45 | 3.92  | 1.72 | 2.86 | 2.83 | 7.77  | 3.05 | 0.87 | 1.16 | 17.60 | 3.16 | 84.60  | 2.57 | 63.93  | 2.67 | 59.77  | 3.04 | 13.33 | 0.43 | 266.77 |
| 0.45 | 2.72 | 3.46  | 0.83 | 0.48  | 0.87 | 1.90 | 2.29 | 1.47  | 2.18 | 0.20 | 2.44 | 6.07  | 3.51 | 170.00 | 0.59 | 96.87  | 2.19 | 24.20  | 0.41 | 13.90 | 1.44 | 319.01 |
| 0.90 | 2.66 | 20.53 | 2.15 | 7.95  | 0.74 | 6.66 | 1.43 | 23.10 | 1.50 | 1.09 | 1.40 | 16.30 | 1.06 | 30.10  | 2.51 | 42.03  | 0.14 | 68.13  | 2.12 | 22.03 | 2.14 | 238.83 |
| 0.49 | 2.08 | 33.63 | 1.50 | 6.35  | 0.34 | 4.65 | 1.24 | 12.87 | 0.90 | 2.49 | 0.40 | 34.90 | 1.99 | 20.30  | 1.78 | 65.07  | 2.77 | 141.00 | 1.88 | 14.40 | 1.84 | 336.15 |
| 1.01 | 1.78 | 26.73 | 2.10 | 7.93  | 1.73 | 7.39 | 2.39 | 26.20 | 1.01 | 1.70 | 2.70 | 17.67 | 1.73 | 7.88   | 3.05 | 37.97  | 3.00 | 82.90  | 0.84 | 17.00 | 2.35 | 234.37 |
| 0.47 | 3.64 | 8.94  | 1.01 | 2.07  | 0.30 | 2.22 | 3.52 | 4.11  | 2.49 | 0.77 | 0.99 | 19.10 | 1.89 | 106.67 | 0.54 | 94.37  | 2.59 | 59.90  | 3.41 | 12.27 | 2.86 | 310.88 |
| 0.59 | 1.84 | 21.63 | 1.92 | 5.77  | 0.27 | 4.35 | 2.87 | 15.13 | 1.01 | 1.52 | 2.65 | 15.90 | 2.27 | 13.20  | 2.00 | 42.73  | 0.68 | 59.93  | 1.62 | 12.67 | 2.28 | 193.43 |
| 0.47 | 2.72 | 20.13 | 1.60 | 7.54  | 1.60 | 4.21 | 1.66 | 17.63 | 0.28 | 1.30 | 0.77 | 14.57 | 3.24 | 8.79   | 0.01 | 21.93  | 1.47 | 59.10  | 0.45 | 6.93  | 3.33 | 162.61 |
| 0.71 | 1.52 | 11.93 | 2.40 | 1.68  | 1.94 | 3.52 | 2.22 | 4.20  | 1.20 | 0.79 | 0.26 | 14.90 | 0.01 | 106.00 | 2.83 | 100.40 | 2.42 | 58.03  | 2.33 | 18.47 | 3.08 | 320.63 |
| 0.90 | 2.03 | 22.43 | 1.35 | 4.06  | 1.26 | 5.29 | 2.07 | 16.17 | 0.76 | 1.63 | 1.60 | 23.67 | 2.68 | 70.23  | 1.76 | 75.90  | 1.64 | 91.97  | 2.12 | 25.65 | 1.36 | 337.90 |
| 0.78 | 2.39 | 9.23  | 0.48 | 1.21  | 1.72 | 3.36 | 0.91 | 3.64  | 1.14 | 0.48 | 1.67 | 11.70 | 1.71 | 92.30  | 0.99 | 95.10  | 0.48 | 43.17  | 1.17 | 22.40 | 3.65 | 283.37 |
| 0.49 | 2.79 | 29.40 | 0.56 | 9.21  | 0.34 | 3.07 | 2.47 | 15.43 | 2.70 | 1.91 | 1.32 | 44.87 | 1.05 | 24.27  | 1.32 | 40.70  | 0.43 | 132.67 | 1.74 | 11.63 | 1.99 | 313.65 |
| 0.49 | 1.82 | 19.87 | 1.45 | 7.86  | 1.05 | 3.19 | 0.94 | 20.13 | 0.76 | 1.46 | 1.97 | 33.13 | 1.14 | 17.83  | 2.59 | 58.33  | 1.73 | 111.00 | 2.38 | 5.69  | 2.04 | 279.00 |
| 0.58 | 2.81 | 10.47 | 2.51 | 1.74  | 0.55 | 3.38 | 2.71 | 3.51  | 1.03 | 0.51 | 2.14 | 11.80 | 1.47 | 86.83  | 1.27 | 98.23  | 2.44 | 45.37  | 1.43 | 16.10 | 1.64 | 278.52 |
| 0.30 | 1.34 | 17.50 | 0.76 | 6.06  | 0.01 | 2.03 | 1.58 | 8.98  | 1.22 | 1.09 | 0.92 | 19.47 | 2.08 | 11.57  | 2.78 | 25.07  | 1.66 | 97.53  | 3.52 | 6.32  | 1.82 | 195.92 |
| 0.83 | 0.46 | 7.99  | 2.79 | 1.10  | 1.63 | 3.78 | 2.79 | 2.72  | 1.33 | 0.33 | 0.18 | 6.73  | 2.50 | 134.33 | 1.55 | 85.73  | 0.70 | 36.03  | 1.70 | 24.37 | 2.02 | 303.94 |
| 0.79 | 2.71 | 6.79  | 2.24 | 0.92  | 1.85 | 3.37 | 2.52 | 2.21  | 3.26 | 0.36 | 2.93 | 7.15  | 1.96 | 93.40  | 1.23 | 102.00 | 2.59 | 30.23  | 2.67 | 23.60 | 1.69 | 270.82 |
| 0.74 | 2.30 | 20.33 | 0.42 | 4.93  | 1.24 | 4.56 | 1.97 | 15.00 | 2.31 | 1.17 | 1.97 | 15.37 | 3.58 | 50.90  | 2.13 | 42.47  | 3.54 | 64.40  | 1.34 | 17.83 | 1.97 | 237.70 |
| 0.31 | 1.99 | 19.67 | 1.20 | 12.77 | 0.29 | 3.53 | 3.03 | 17.53 | 3.29 | 1.39 | 0.83 | 22.60 | 2.03 | 4.06   | 1.97 | 8.83   | 2.53 | 91.90  | 1.28 | 4.28  | 2.34 | 186.85 |

|      |      |       |      |       |      |      |      |       |      |      |      |       |      |        |      |        |      |       |      |       |      |        |
|------|------|-------|------|-------|------|------|------|-------|------|------|------|-------|------|--------|------|--------|------|-------|------|-------|------|--------|
| 0.32 | 0.64 | 26.10 | 2.10 | 11.97 | 1.67 | 2.73 | 3.62 | 17.57 | 1.31 | 1.70 | 1.48 | 27.33 | 2.38 | 6.19   | 1.19 | 19.30  | 1.04 | 92.93 | 1.33 | 7.98  | 2.82 | 214.11 |
| 0.44 | 1.33 | 3.00  | 1.99 | 0.36  | 0.77 | 1.70 | 2.90 | 1.05  | 1.65 | 0.15 | 1.98 | 5.44  | 2.48 | 163.67 | 3.14 | 105.67 | 1.09 | 21.47 | 1.88 | 14.43 | 1.60 | 317.38 |
| 0.57 | 2.46 | 15.47 | 0.67 | 3.47  | 1.35 | 2.92 | 3.16 | 6.86  | 1.68 | 0.90 | 0.63 | 17.23 | 1.21 | 45.13  | 4.02 | 48.47  | 1.75 | 71.07 | 2.89 | 14.03 | 1.48 | 226.12 |
| 0.55 | 1.01 | 21.10 | 1.23 | 6.12  | 0.95 | 3.73 | 3.64 | 14.23 | 1.07 | 1.80 | 1.29 | 18.03 | 2.85 | 6.33   | 3.01 | 36.03  | 3.47 | 65.40 | 3.22 | 11.87 | 3.80 | 185.19 |
| 0.58 | 0.97 | 25.13 | 0.44 | 13.03 | 2.40 | 5.19 | 1.50 | 31.37 | 3.01 | 1.65 | 2.42 | 18.97 | 1.61 | 4.54   | 1.14 | 12.97  | 0.45 | 71.93 | 1.66 | 8.38  | 0.50 | 193.74 |
| 0.38 | 3.10 | 3.36  | 1.77 | 0.40  | 0.91 | 1.61 | 3.19 | 1.10  | 1.57 | 0.25 | 2.83 | 6.95  | 0.55 | 163.33 | 1.77 | 132.00 | 3.47 | 20.87 | 2.26 | 14.33 | 1.76 | 344.58 |

---





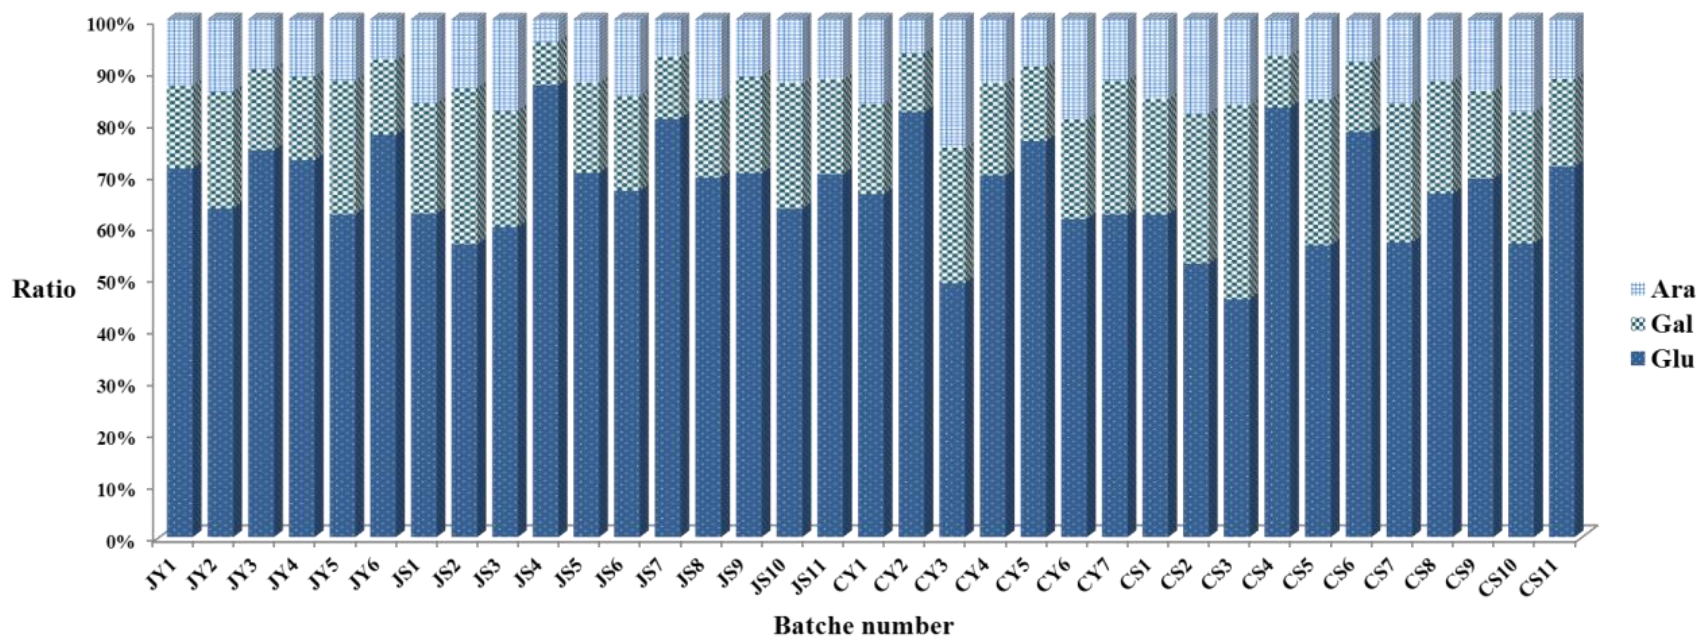

**Figure S1** Ratio of each monosaccharide in total content of saccharides in 35 batches.

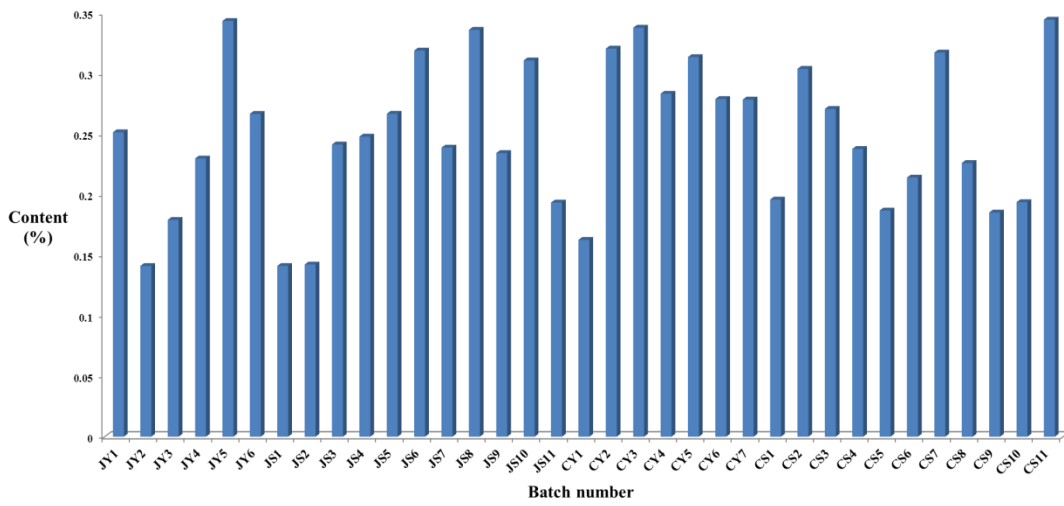

**Figure S2** Total content of main triterpenes in 35 batches of Alismatis Rhizoma.

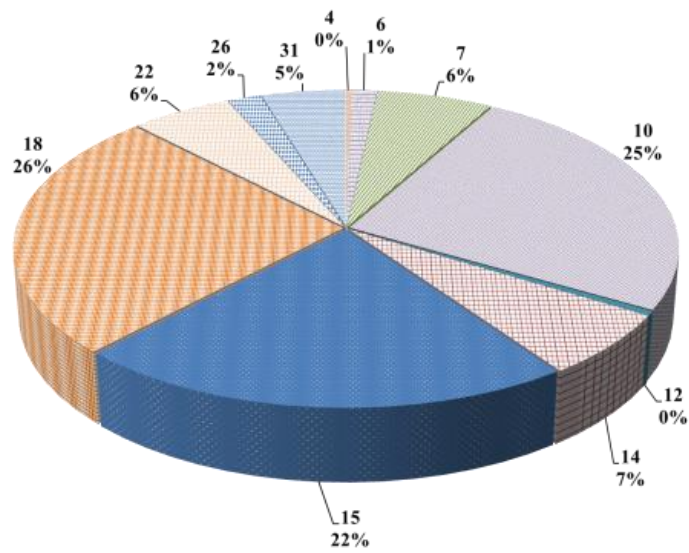

**Figure S3** Average ratio of each triterpene in total content of triterpenes in Alismatis Rhizoma.

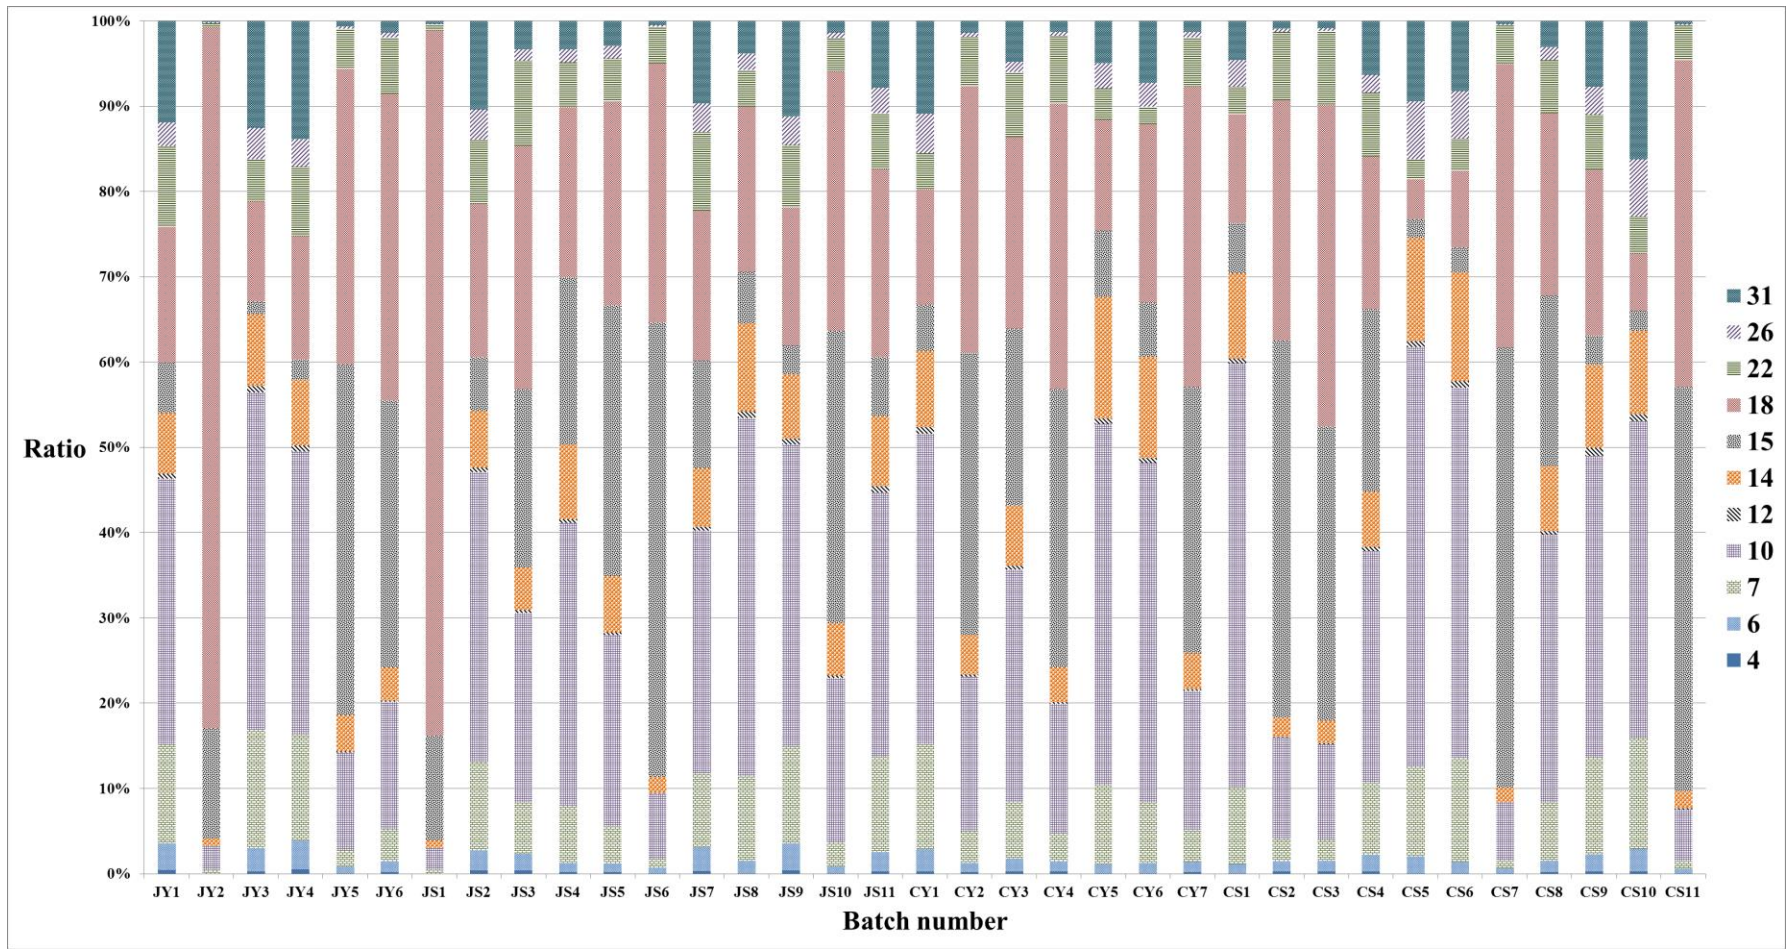

**Figure S4** Ratio of each triterpenes in total content of triterpenes in 35 batches of Alismatis Rhizoma.

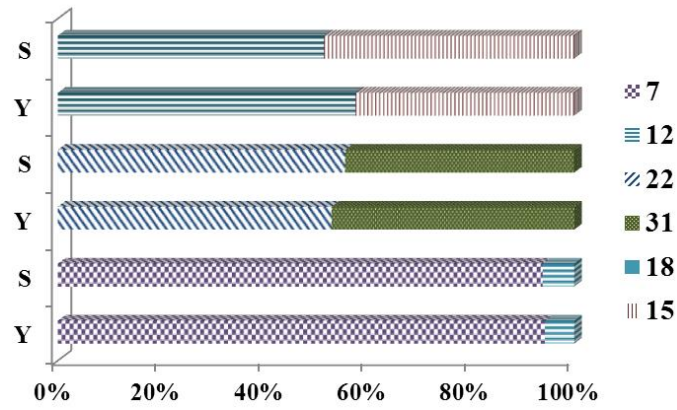

Figure S5 Relative ratios about 12/7, 31/22 and 15/18 between JY+CY samples and JS+CS samples

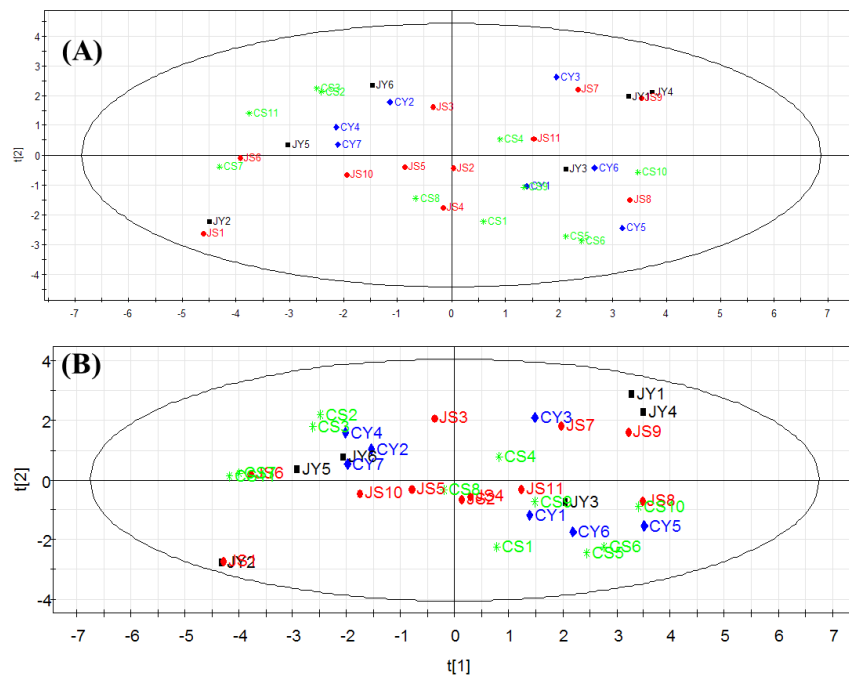

Figure S6 Scatter plot of PCA of 35 batches of Alismatis Rhizoma on the first two principle components. (A) with content of triterpenes and polysaccharides; (B) with the content of triterpenes.
